# Supplementary material
Source: HighWire-hosted journal article supplement (https://bmjopen.bmj.com/content/6/6/e010696)
Supplement: inline-supplementary-material-1 [file inline-supplementary-material-1.pdf]

## Additional File 1 – Summary of the definitions of time to health-related quality of life score explored

**Table A1. Summary of the four definitions of time to health-related quality of life score deterioration approach retained with the corresponding sensitivity analysis**

| to be considered<br>as Events | deterioration in  |                    | other events |          |                                                               |
|-------------------------------|-------------------|--------------------|--------------|----------|---------------------------------------------------------------|
|                               | one defined score | at least one score | death        | toxicity | patients with no<br>follow up<br>(in sensitivity<br>analysis) |
| <b>TTD</b>                    |                   |                    |              |          |                                                               |
| 1                             | X                 |                    |              |          | X                                                             |
| 2                             | X                 |                    | X            |          | X                                                             |
| 3                             |                   | X                  |              |          | X                                                             |
| 4                             |                   | X                  |              | X        | X                                                             |

X: event considered
